# Supplementary material for: Biomimetic mineralization of a hydroxyapatite crystal in the presence of a zwitterionic polymer
Source: Royal Society of Chemistry journal article supplement (doi:10.1039/c8ce00119g), 2018-01-01
Supplement: c8ce00119g1.pdf [file c8ce00119g1.pdf]

## Supporting Information

### Biomimetic mineralization of Hydroxyapatite Crystal in the Presence of Zwitterionic Polymer

Meng Xu<sup>a</sup>, Feng Ji<sup>a</sup>, Zhihui Qin<sup>a</sup>, Dianyu Dong<sup>a</sup>, Xinlu Tian<sup>a</sup>, Rui Niu<sup>a</sup>, Da Sun<sup>d</sup>, Fanglian Yao<sup>\*,a,b</sup>, Junjie Li<sup>\*,c</sup>

*a) School of Chemical Engineering and Technology, Tianjin University, Tianjin 300072, China. Email: yaofanglian@tju.edu.cn.*

*b) Key Laboratory of Systems Bioengineering of Ministry of Education. Tianjin University, Tianjin, 300072, China.*

*c) Department of Advanced Interdisciplinary Studies, Institute of Basic Medical Sciences and Tissue Engineering Research Center, Academy of Military Medical Science, Beijing 100850, China. Email: li41308@aliyun.com.*

*d) Department of Biomedical Engineering, Case Western Reserve University, Cleveland, OH 44106, USA*

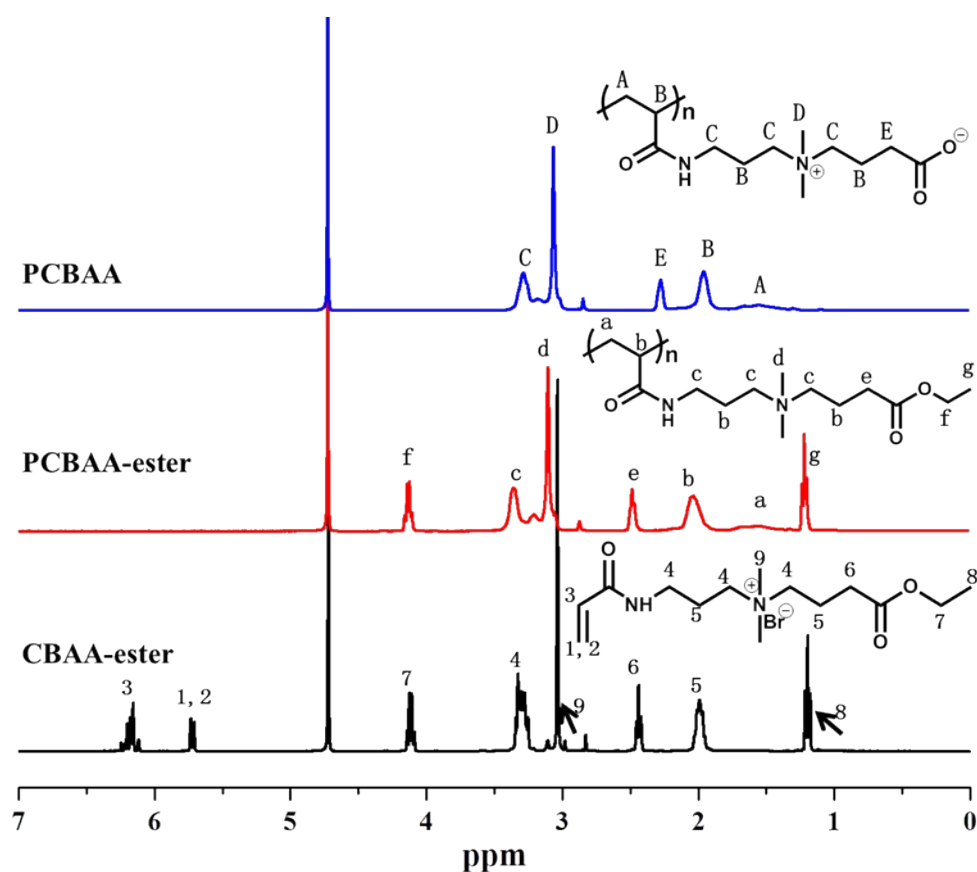

**Figure S1.** <sup>1</sup>H NMR spectra of CBAAs-ester, PCBAA-ester and PCBAA.

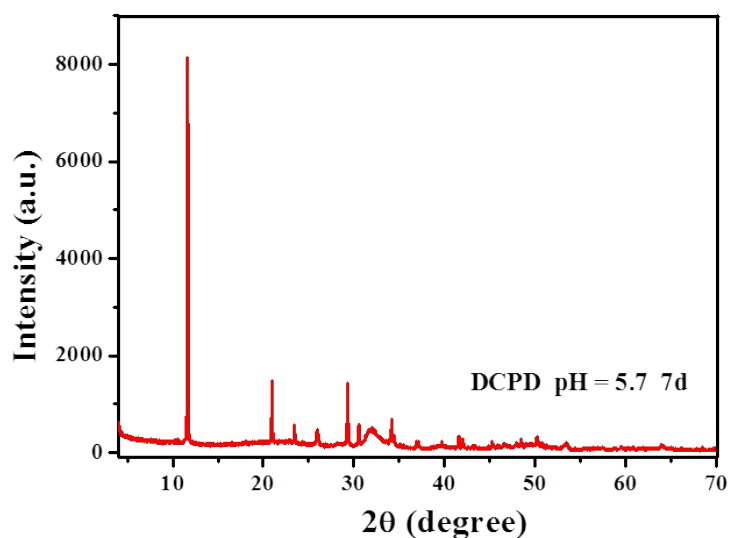

**Figure S2.** XRD spectra of nHA generated in water at 7 d at pH = 5.7.

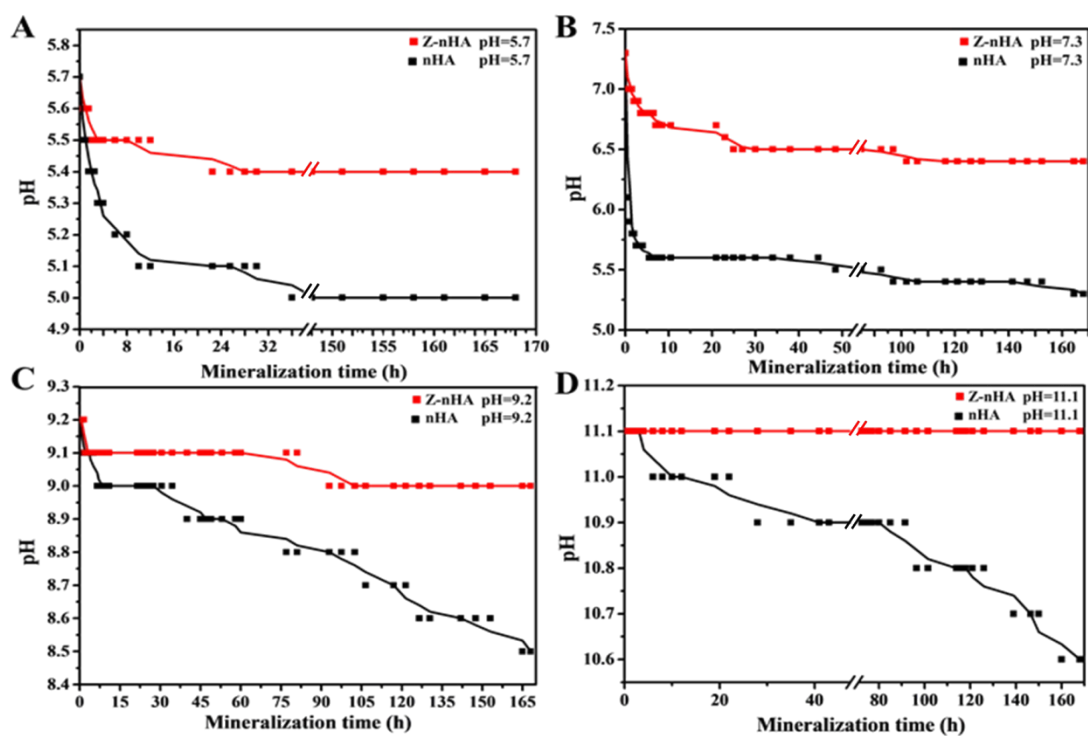

**Figure S3.** The variation of pH value along time with and without PCBAA at values of (A) 5.7, (B) 7.3, (C) 9.2 and (D) 11.1.

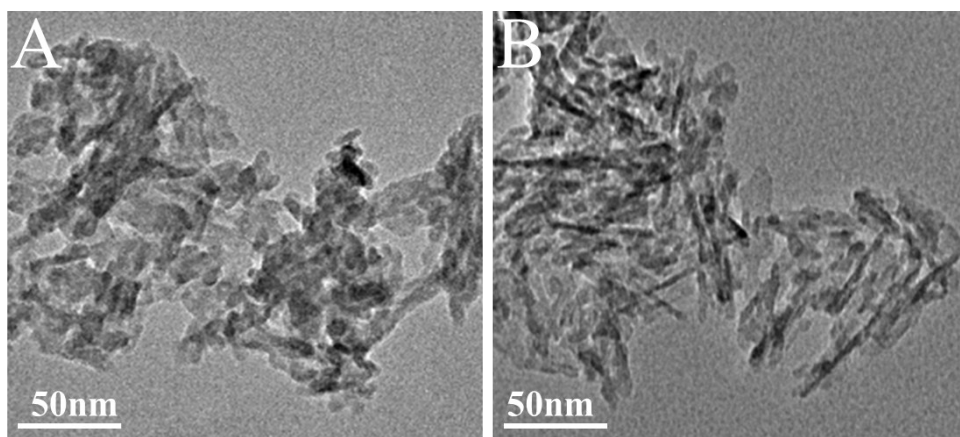

**Figure S4.** TEM images of nHA crystals synthesized in 10 g/L PCBAA solution after different reaction time at 37 °C: (A) 72 h, (B) 120 h.

**Table S1.** The average sizes of *c*-axis and *a*-axis calculated from (002) and (300) faces of apatite respectively at different mineralization time.

| Mineralization Time (h) | Crystal Size (nm) |                |            |
|-------------------------|-------------------|----------------|------------|
|                         | <i>c</i> -axis    | <i>a</i> -axis | <i>c/a</i> |
| 0.5                     | 27.23             | 9.40           | 2.90       |
| 2                       | 31.50             | 9.57           | 3.29       |
| 5                       | 23.57             | 9.37           | 2.52       |
| 12                      | 15.13             | 7.60           | 1.99       |
| 24                      | 16.17             | 23.07          | 0.70       |
| 72                      | 16.43             | 23.83          | 0.69       |
| 120                     | 18.90             | 27.33          | 0.69       |
| 168                     | 19.33             | 19.91          | 0.97       |
